# Supplementary material for: Cryopyrin activates the inflammasome in response to toxins and ATP
Source: Springer Nature journal article supplement (doi:10.1038/nature04515), 2006-01-11

## **Supplementary Information**

I. Supplementary Materials and Methods

II. Supplemental Figure Legends

III. Supplemental Figures

### **I. Supplementary Materials and Methods**

#### **Macrophages**

Macrophages obtained by peritoneal lavage 5 days after mice were injected intraperitoneally with 4% thioglycollate were cultured in the high glucose version of Dulbecco's modified Eagle's medium containing 10% heat-inactivated fetal calf serum, 10 mM HEPES, 10 mM pyruvate, 10 mM L-glutamine, 50 µg/mL penicillin, and 50 µg/mL streptomycin. Bone marrow cells were cultured for 7 days in 30% M-CSF conditioned medium. For infection, adherent macrophages were cultured overnight in 50 ng/mL ultra-pure LPS, washed with antibiotic-free medium, and infected at a multiplicity of infection of 50 (30 for *F. tularensis*). Plates were spun for 15 min at 850 x g and then incubated at 37°C, 5% CO<sub>2</sub> for 1 (*S. typhimurium*), 2.5 (*L. monocytogenes*), 3 (*S. aureus*) or 5 (*F. tularensis*) h. With the exception of *S. typhimurium* infections, gentamicin (20 µg/mL) was added to cultures 90 min after infection. For immunoprecipitation and Western blot analyses, macrophages were lysed in buffer A [10 mM phosphate pH 7.4, 150 mM NaCl, 1% NP-40, 0.5% sodium deoxycholate, 0.1% SDS, 2 mM DTT, Complete<sup>TM</sup> protease inhibitor cocktail (Roche)]. Culture supernatants were mixed 1:1 with 2x buffer A.

## **Bacteria**

*F. tularensis* ssp. *novicida*, strain U112 was grown overnight with aeration in Trypticase Soy Broth supplemented with 0.2% cysteine. *S. typhimurium* SL1344 was grown in high salt Luria broth standing at 37°C overnight, *S. aureus* in BHI broth standing at 37°C, 5% CO<sub>2</sub> overnight. *L. monocytogenes* wild-type 10403s and listeriolysin O mutant DPL2161 strains were grown standing in BHI at 25°C.

## II. Supplemental Figure Legends

**Supplementary Figure 1.** Generation of *Cias1*<sup>-/-</sup> mice. (a) Exons 1, 2, and 3 (closed boxes) were replaced with a neomycin resistance cassette. Exon 3 encodes the initiating methionine (ATG) and the entire pyrin domain of cryopyrin. Exons 1 and 2 encode the 5' UTR. An additional 155 base pairs upstream of exon 1 also were deleted. C57BL/6 C2 embryonic stem (ES) cells were electroporated with the targeting vector and two independent *Cias1*<sup>+/-</sup>-clones (7G5 and 9B5) were identified. Chimeric mice were generated from each ES clone and backcrossed to C57BL/6N mice. Mouse strains 7G5 and 9B5 gave similar results. Mice analyzed were 6-20 weeks old. (b) Southern blot analysis of the offspring from *Cias1*<sup>+/-</sup>-intercrosses. *EcoRI*-digested tail DNA was hybridized with the probe indicated in (a) to yield a 10.9 kb wild-type and an 8.1 kb *cryopyrin* mutant band. (c) RT-PCR analysis of Cryopyrin mRNA expression in thioglycollate-elicited peritoneal macrophages. RNA was isolated from freshly harvested macrophages or macrophages cultured with LPS (200 ng/ml) for 6 h. The following intron-spanning primers were used for RT-PCR: Cryopyrin forward primer sm512 (binding within exon 4: 5' TAT GGT ATG CCA GGA GGA CAG CC) and reverse primer sm513 (binding within exon 5: 5' TCT GCT AGA CTC CTT GGC GTC C) amplified a 507 bp cDNA fragment (upper panel); Cryopyrin forward primer sm455 (binding within exon 3: 5' ATG ACG AGT GTC CGT TGC AAG C) and reverse primer sm457 (binding with exon 5: 5' CTG TTG AGG TCC ACA CTC TCA CCT AGA C) amplified a 485 bp cDNA fragment (middle panel); Control HPRT forward primer (5' GCT GGT GAA AAG GAC CTC T) and reverse primer (5' CAC AGG ACT AGA ACA

CCT GC) amplified a 249 bp cDNA fragment (lower panel). Amplification of the housekeeping gene HPRT was used to check the integrity of the RNA templates.

**Supplementary Figure 2.** Nigericin or maitotoxin alone does not promote IL-1 $\beta$  release. IL-1 $\beta$  secretion by wild-type (WT) macrophages treated with ultra-pure LPS and/or nigericin (**a**) or ultra-pure LPS and/or maitotoxin (**b**). Bars represent the mean  $\pm$  standard deviation of triplicate wells.

**Supplementary Figure 3.** Generation of *Nod2*<sup>-/-</sup> mice. (**a**) Genomic sequence encoding exon 3 was replaced with a PGK-neo cassette. In addition, stop codons in all 3 reading frames were introduced after the exon 3 splice acceptor site. The targeting construct was electroporated into 129 R1 ES cells and chimeric mice were generated from two independent ES cell clones (9C4 and 14C4). *Nod2*<sup>-/-</sup> mice were backcrossed to C57BL/6N for up to 8 generations. Mouse strains 9C4 and 14C4 gave similar results. (**b**) Southern blot analysis of the offspring from *Nod2*<sup>+/-</sup> intercrosses. *Nhe* I-digested tail DNA was hybridized with the probe indicated in (a) to yield a 9.0 kb wild-type (WT) and a 4.0 kb *nod2* mutant band. (**c**) Immunoprecipitation and Western blot analysis of NOD2 in thioglycollate-elicited peritoneal macrophages from WT and *Nod2*<sup>-/-</sup> mice. Immunoprecipitations were performed with rabbit polyclonal antibodies raised against the two N-terminal CARDS of mouse Nod2 (Genentech) and Western blots were performed using a hamster monoclonal antibody raised against the leucine rich repeats of mouse NOD2 (clone 10G1, Genentech). H.C. = heavy chain

**Supplementary Figure 4.** Macrophage death after infection by *S. typhimurium*, *F. tularensis*, *S. aureus*, or *L. monocytogenes*. Macrophages were seeded in 96-well plates at  $5 \times 10^4$  cells per well and incubated overnight with 50 ng/mL ultra-pure LPS. Cells were then infected with the indicated bacteria (as described in the Supplementary Methods) and cell death was quantified with a CytoTox96 LDH-release kit (Promega) after 1 (*S. typhimurium*), 5 (*F. tularensis*), 3 (*S. aureus*), or 2.5 (*L. monocytogenes*) h. Percent cell death was quantified as: [(LDH released from infected cells – LDH released from untreated cells)/(LDH released from detergent-lysed cells – LDH released from untreated cells)]\*100. Bars represent the mean  $\pm$  standard deviation of 3 mice of each genotype. Results are representative of 4-5 independent experiments.

**Supplementary Figure 5.** *S. aureus* alpha, beta, and gamma hemolysins are not required for IL-1 $\beta$  secretion from infected macrophages. Wild-type (*Cias1*<sup>+/+</sup>), *Cias1*<sup>-/-</sup> and *Asc*<sup>-/-</sup> macrophages were infected with WT *S. aureus* (strain 8325-4; ref. 1) or mutants deficient in alpha (strain DU1090; ref. 2), beta (strain DU5719; ref. 3), or gamma hemolysin (strain DU5942; ref. 4) and IL-1 $\beta$  secretion was determined after 3 h. Bars represent the mean  $\pm$  standard deviation of triplicate wells. Results are representative of 3 independent experiments.

1. Novick, R. Properties of a cryptic high-frequency transducing phage in *Staphylococcus aureus*. *Virology* **33**:155–166. (1967).

2. O'Reilly, M. De Azavedo, J. C. S. Kennedy, S. Foster, T.J. Inactivation of the alpha-hemolysin gene of *Staphylococcus aureus* 8325-4 by site directed mutagenesis and studies on the expression of hemolysins. *Microb. Pathog.* **1**:125–138. (1986).
3. Bramley, A. J. Patel, A.H. O'Reilly, M. Foster, R. Foster, T.J. Roles of alpha-toxin and beta-toxin in virulence of *Staphylococcus aureus* for the mouse mammary gland. *Infect. Immun.* **57**:2489–2494. (1989).
4. Nilsson, I. Hartford, O. Foster, T.J. Tarkowskii, A. Alpha-toxin and gamma-toxin jointly promote *Staphylococcus aureus* virulence in murine septic arthritis. *Infect. Immun.* **67**:1045–1049. (1999).

**Supplementary Figure 6.** Macrophages infected with *S. aureus* or *F. tularensis* do not require pretreatment with LPS to secrete IL-1 $\beta$ . Macrophages from wild-type (*Cias1*<sup>+/+</sup>), *Cias1*<sup>-/-</sup>, or *Asc*<sup>-/-</sup> mice were infected with *S. aureus* or *F. tularensis* with (left panel) or without (right panel) overnight pretreatment with 50 ng/mL ultra-pure LPS. IL-1 $\beta$  released at 5 (*F. tularensis*) or 3 (*S. aureus*) h post-infection was measured by ELISA. Bars represent the mean  $\pm$  standard deviation of 3 mice of each genotype.

**a**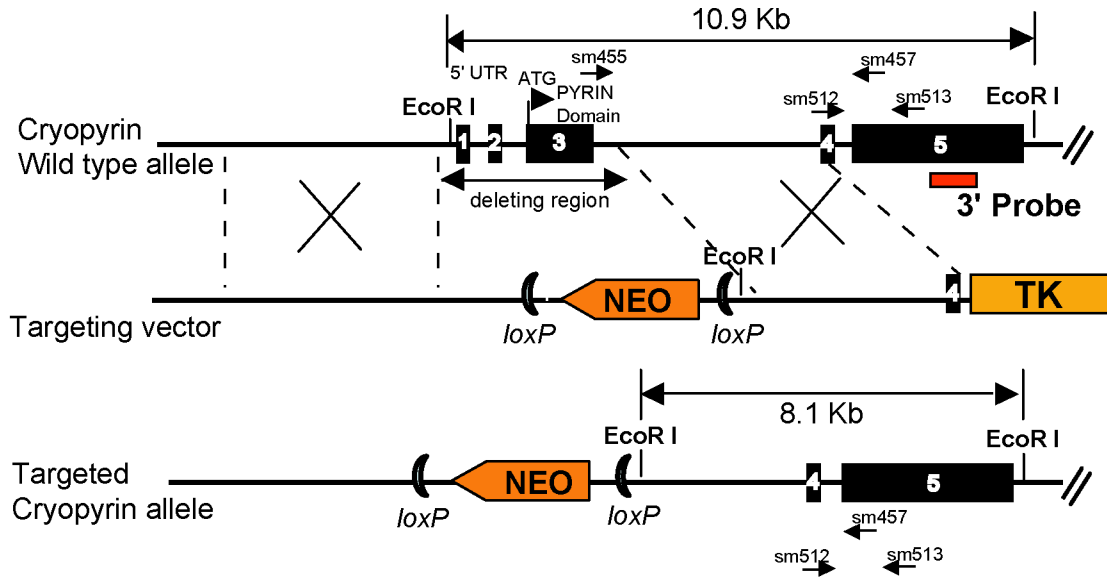**b**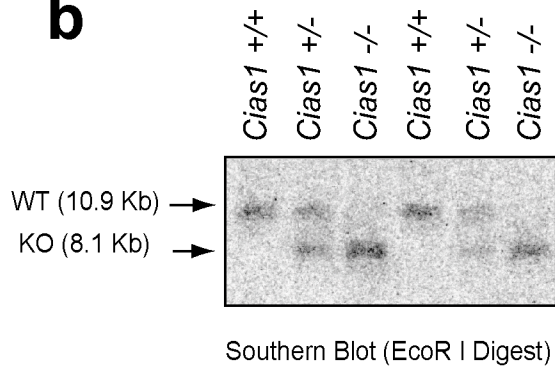**c**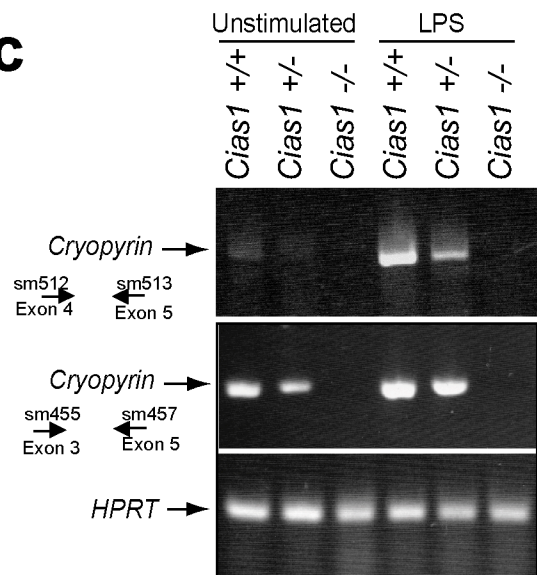

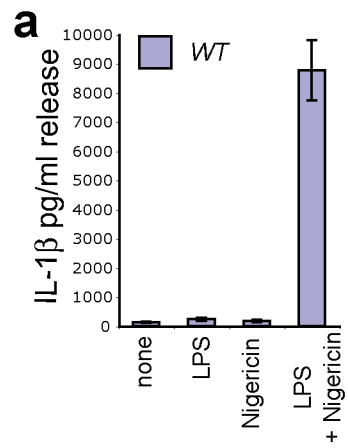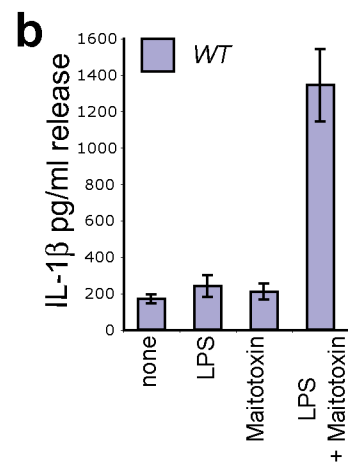



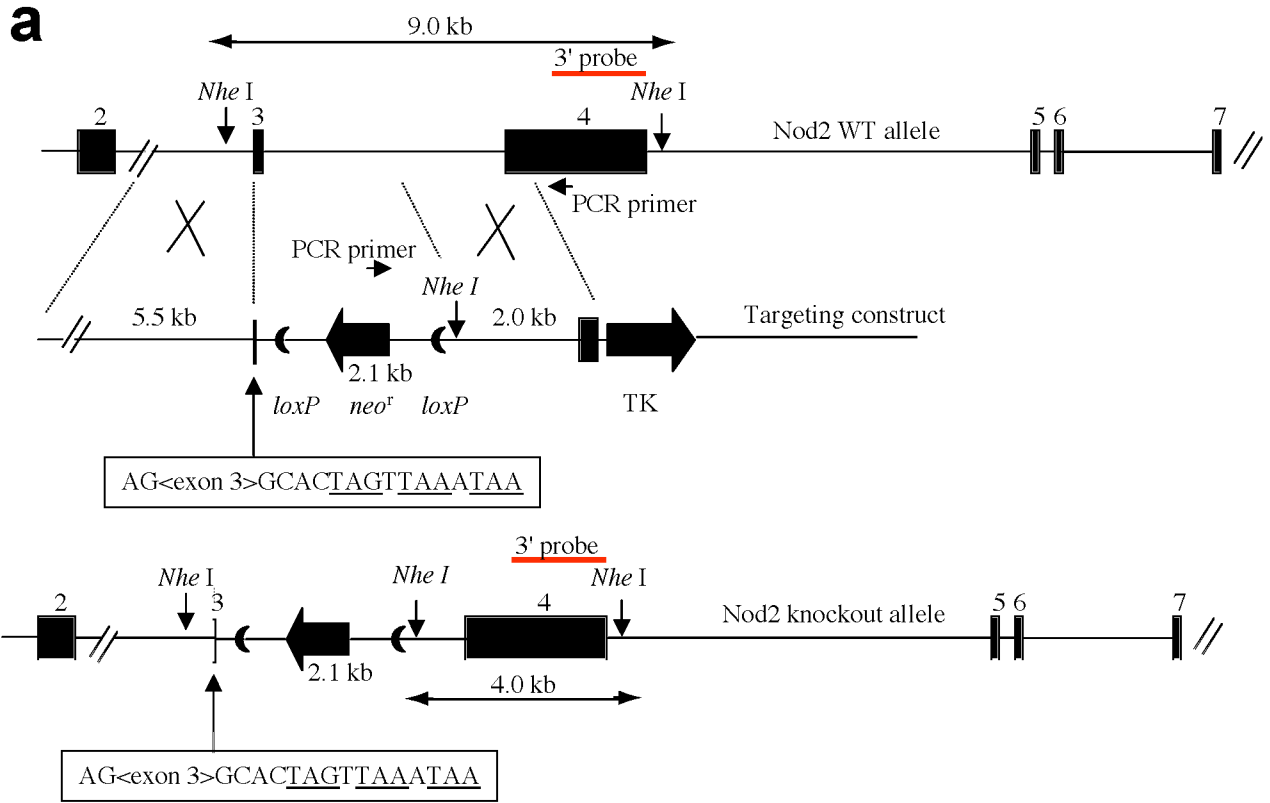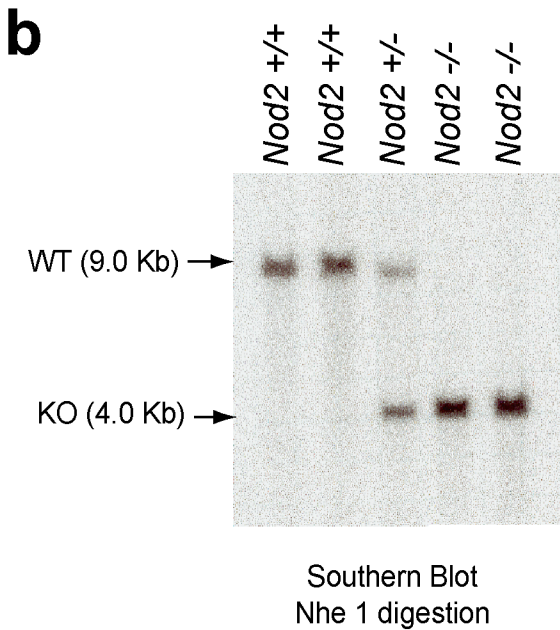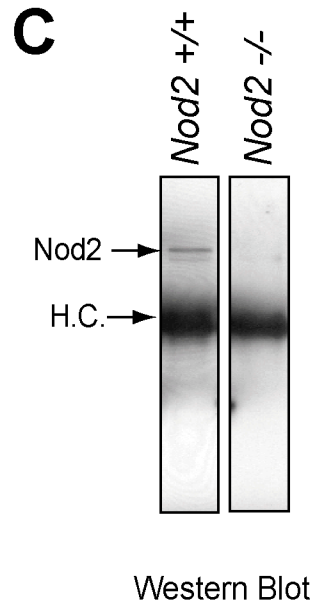

Supplementary Figure 3  
Mariathasan *et al*

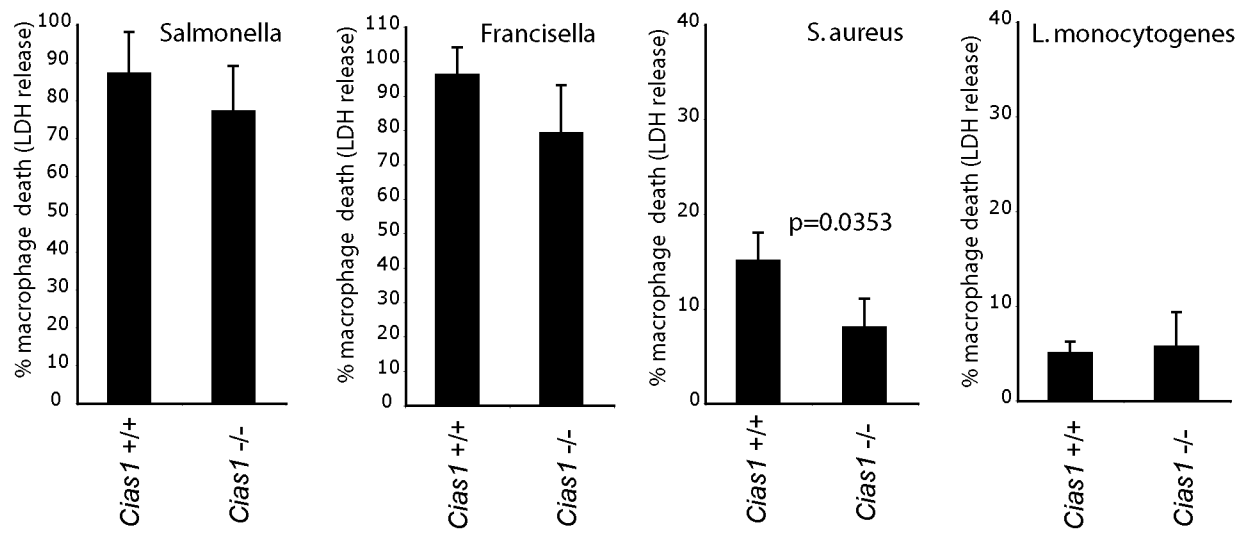

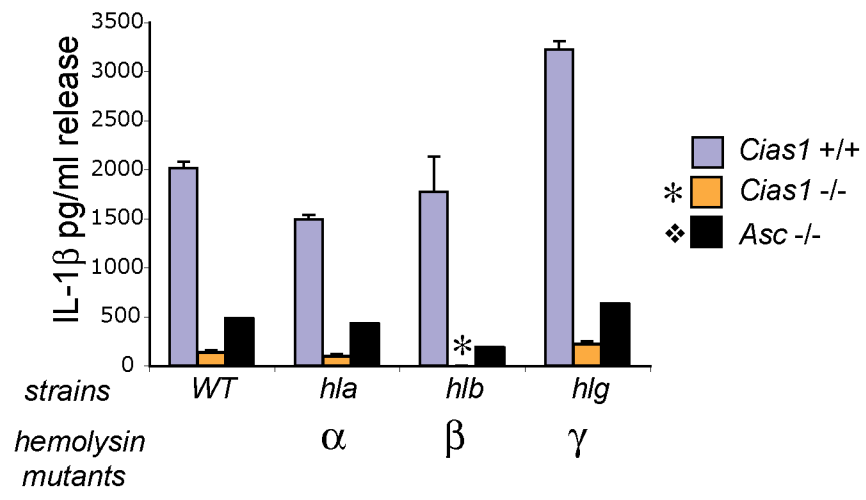

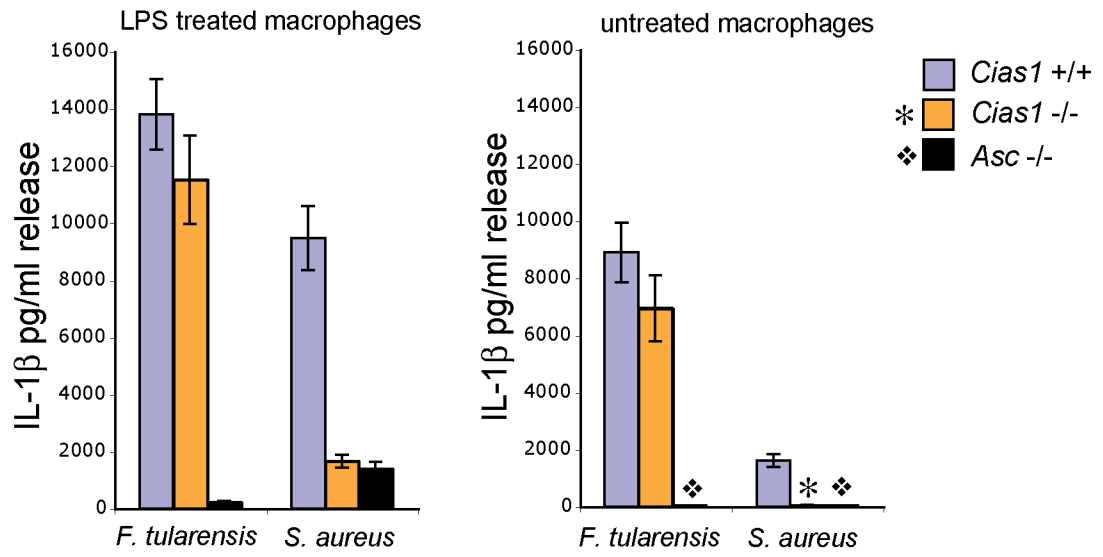

Supplement: 41586_2006_BFnature04515_MOESM1_ESM.pdf [file 41586_2006_BFnature04515_MOESM1_ESM.pdf]
